# Supplementary material
Source: Springer Nature journal article supplement (https://www.springermedizin.de/resource/supplementary/12916_2011_494_MOESM1_ESM.pdf/9598168)

Enrollment

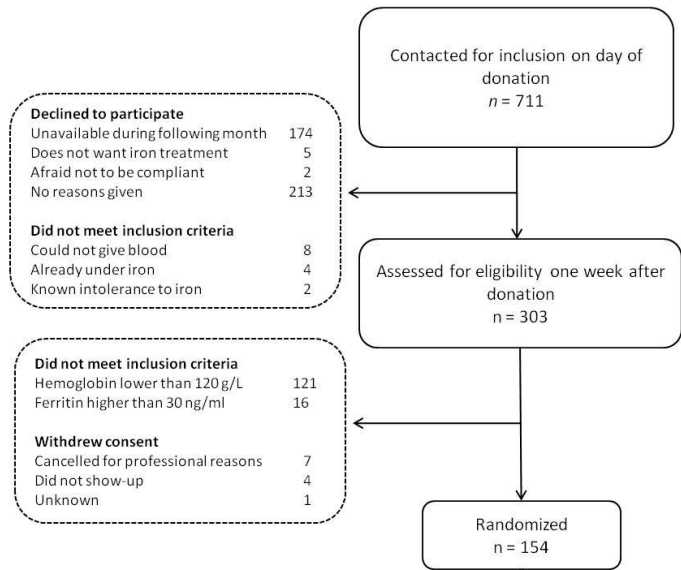

Allocation

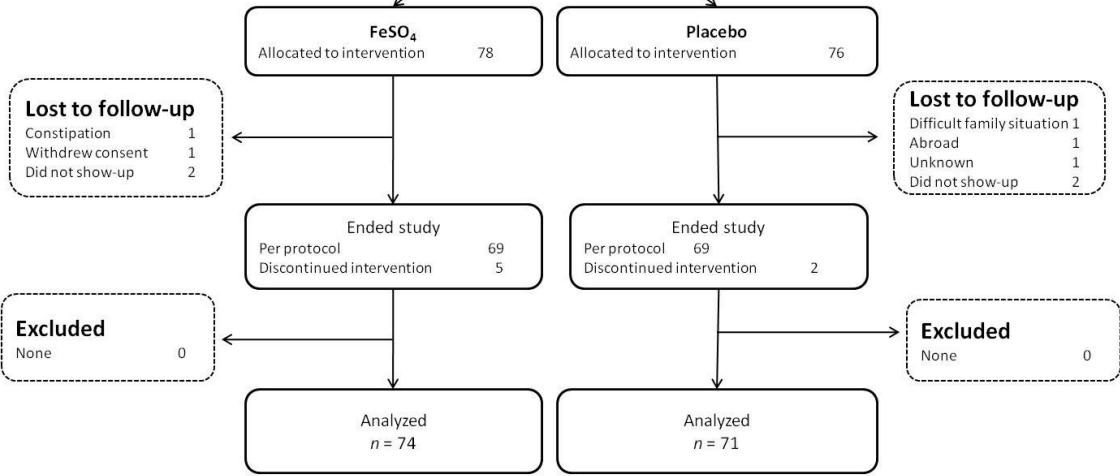

Follow-up

Analysis

Supplement: MOESM1 [file 9598168]
